# Supplementary material
Source: Springer Nature journal article supplement (https://www.springermedizin.de/resource/supplementary/12874_2013_979_MOESM2_ESM.pdf/9433004)
Supplement: MOESM2 [file 9433004]

**Additional file 2 — Results of the stratified Cox model after exclusion of the 37 STR also included in FTR, based on 2713 patients with 2206 FTR and 507 STR (22 STR presenting missing data for the waiting time before re-transplantation were excluded)**

|                                                              | FTR strata |           |         | STR strata |           |         |
|--------------------------------------------------------------|------------|-----------|---------|------------|-----------|---------|
|                                                              | HR         | 95% CI    | p-value | HR         | 95% CI    | p-value |
| <b>Variables entering in z<sup>e</sup> only</b>              |            |           |         |            |           |         |
| Causal nephropathy (recurrent / non recurrent)               | 1.13       | 0.91-1.40 | 0.2792  | -          | -         | -       |
| History of diabetes (positive / negative)                    | 1.26       | 0.93-1.69 | 0.1330  | -          | -         | -       |
| History of hypertension (positive / negative)                | 0.89       | 0.68-1.15 | 0.3593  | -          | -         | -       |
| History of cardiac disease (positive / negative)             | 1.36       | 1.10-1.67 | 0.0041  | -          | -         | -       |
| History of vascular disease (positive / negative)            | 1.13       | 0.85-1.49 | 0.3949  | -          | -         | -       |
| History of dyslipemia (positive / negative)                  | 1.20       | 0.96-1.51 | 0.1174  | -          | -         | -       |
| History of hepatitis B/C (positive / negative)               | 0.98       | 0.65-1.47 | 0.9263  | -          | -         | -       |
| History of malignancy (positive / negative)                  | 1.20       | 0.86-1.68 | 0.2744  | -          | -         | -       |
| Body mass index ( $\geq 30$ kg.m-2 / $< 30$ kg.m-2)          | 1.53       | 1.13-2.08 | 0.0066  | -          | -         | -       |
| Anti-class I PRA (positive / negative)                       | 1.43       | 1.09-1.87 | 0.0090  | -          | -         | -       |
| Anti-class II PRA (positive / negative)                      | 0.98       | 0.73-1.31 | 0.8761  | -          | -         | -       |
| Donor status (deceased/living)                               | 2.04       | 1.25-3.32 | 0.0042  | -          | -         | -       |
| Donor EBV serology (positive / negative)                     | 1.66       | 1.08-2.55 | 0.0219  | -          | -         | -       |
| Number of HLA-A-B-DR mismatches ( $> 4$ / $\leq 4$ )         | 1.34       | 1.02-1.77 | 0.0345  | -          | -         | -       |
| Induction therapy (depleting / non depleting)                | 0.89       | 0.71-1.12 | 0.3138  | -          | -         | -       |
| Cold ischemia time ( $\geq 24$ h / $< 24$ h)                 | 1.22       | 0.99-1.51 | 0.0656  | -          | -         | -       |
| <b>Variables entering in z<sup>c</sup> and z<sup>s</sup></b> |            |           |         |            |           |         |
| Transplantation period ( $< 2005$ / $\geq 2005$ )            | 1.41       | 1.08-1.85 | 0.0113  | 0.99       | 0.56-1.74 | 0.9848  |
| Recipient gender (male / female)                             | 1.17       | 0.91-1.50 | 0.2112  | 0.64       | 0.39-1.03 | 0.0664  |
| Recipient age ( $\geq 55$ years / $< 55$ years)              | 1.36       | 1.04-1.78 | 0.0271  | 1.48       | 0.86-2.53 | 0.1564  |
| Donor age ( $\geq 55$ years / $< 55$ years)                  | 1.36       | 1.04-1.77 | 0.0238  | 0.62       | 0.35-1.09 | 0.0725  |
| <b>Variables entering in z<sup>r</sup> only</b>              |            |           |         |            |           |         |
| Donor gender (male / female)                                 | -          | -         | -       | 1.47       | 0.94-2.31 | 0.0941  |
| Waiting time before regraft $\geq 3$ years                   | -          | -         | -       | 1.90       | 1.22-2.97 | 0.0047  |

PRA, panel reactive antibody; EBV, Epstein-Barr virus; HLA, human leukocyte antigen
